# Supplementary material
Source: PubMed Central journal article supplement (PMC3160089)
Supplement: supp_138.18.3921_DEV062554FigS9.pdf [file supp_138.18.3921_DEV062554FigS9.pdf]

|                           | conversions                                                                       | initial positions of converted cells                                               | positions of cell divisions during primordium migration                             |
|---------------------------|-----------------------------------------------------------------------------------|------------------------------------------------------------------------------------|-------------------------------------------------------------------------------------|
| <i>wt</i>                 |  |  |  |
| <i>lef1<sup>nl2</sup></i> |  |  |  |
