# Supplementary material
Source: PubMed Central journal article supplement (PMC3160089)

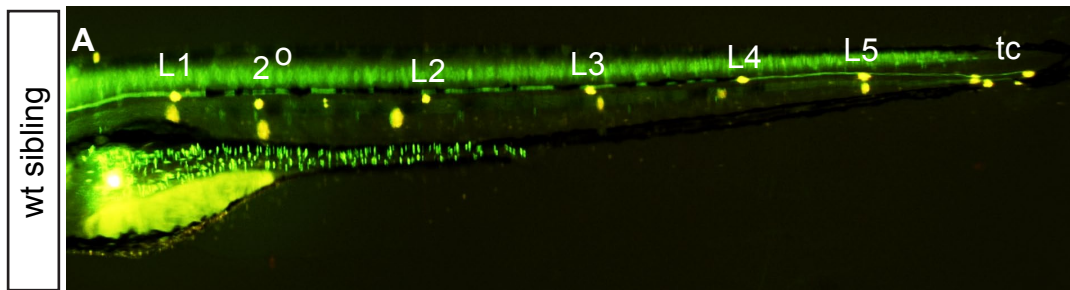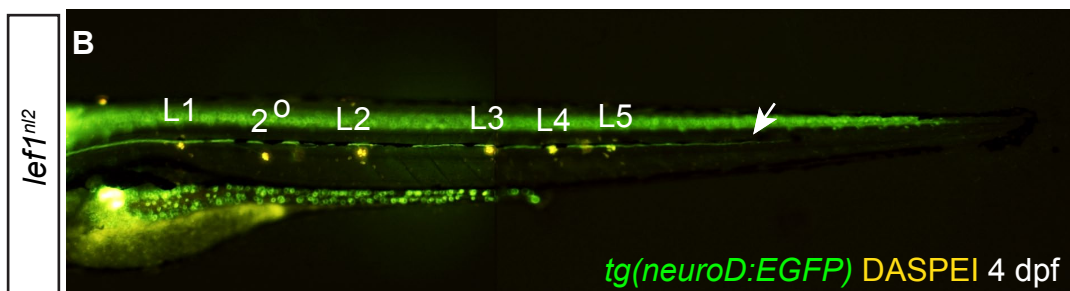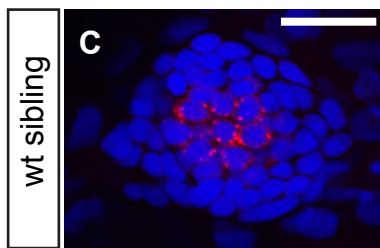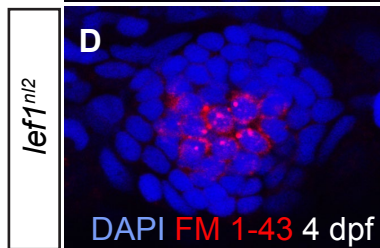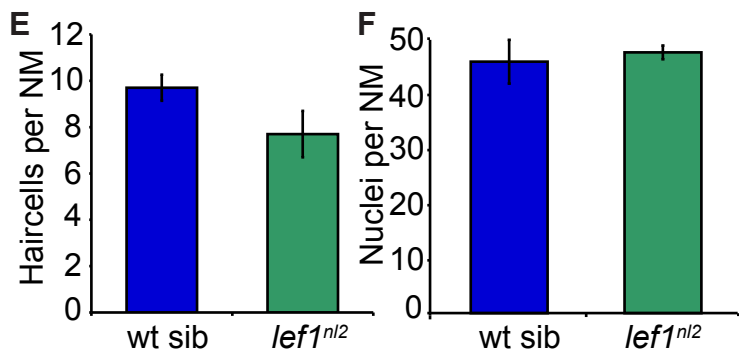

Supplement: supp_138.18.3921_DEV062554FigS1.pdf [file supp_138.18.3921_DEV062554FigS1.pdf]

wt sib

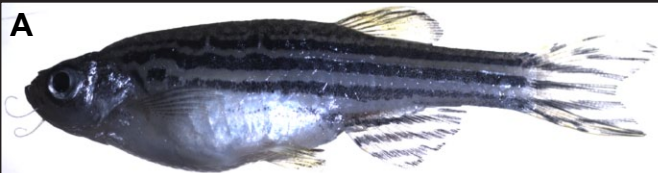

*lef1*<sup>nl/2</sup>

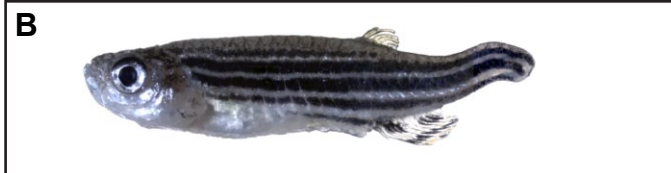

wt sib

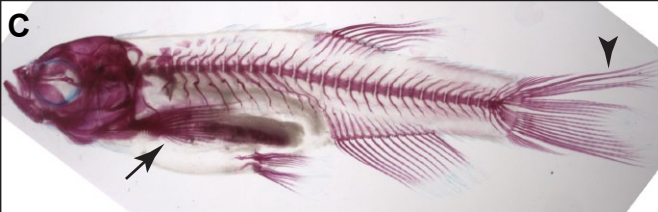

*lef1*<sup>nl/2</sup>

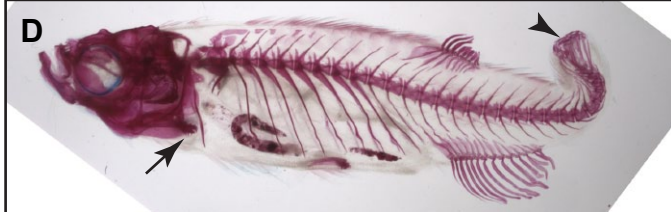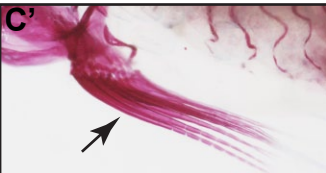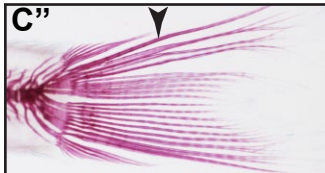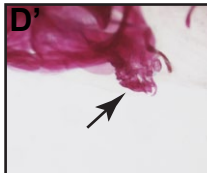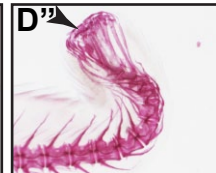

wt sib

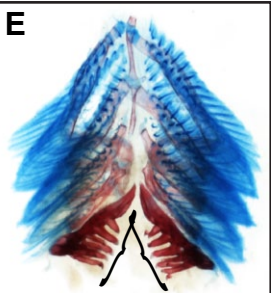

*lef1*<sup>nl/2</sup>

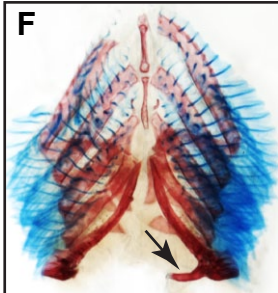

Supplement: supp_138.18.3921_DEV062554FigS2.pdf [file supp_138.18.3921_DEV062554FigS2.pdf]

wt sib

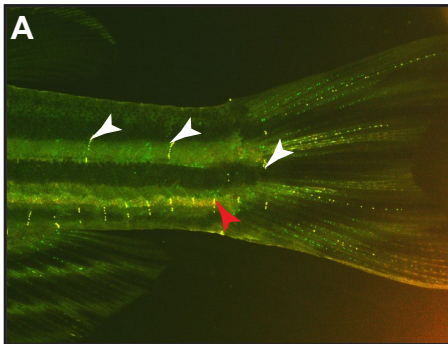

*lef1*<sup>nl2</sup>

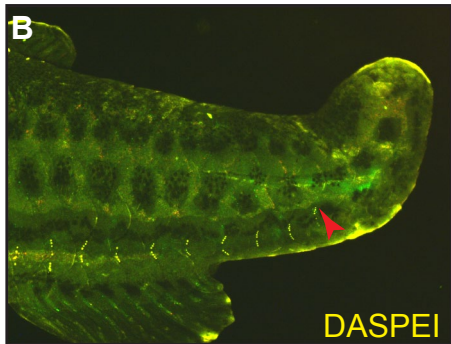

Supplement: supp_138.18.3921_DEV062554FigS3.pdf [file supp_138.18.3921_DEV062554FigS3.pdf]

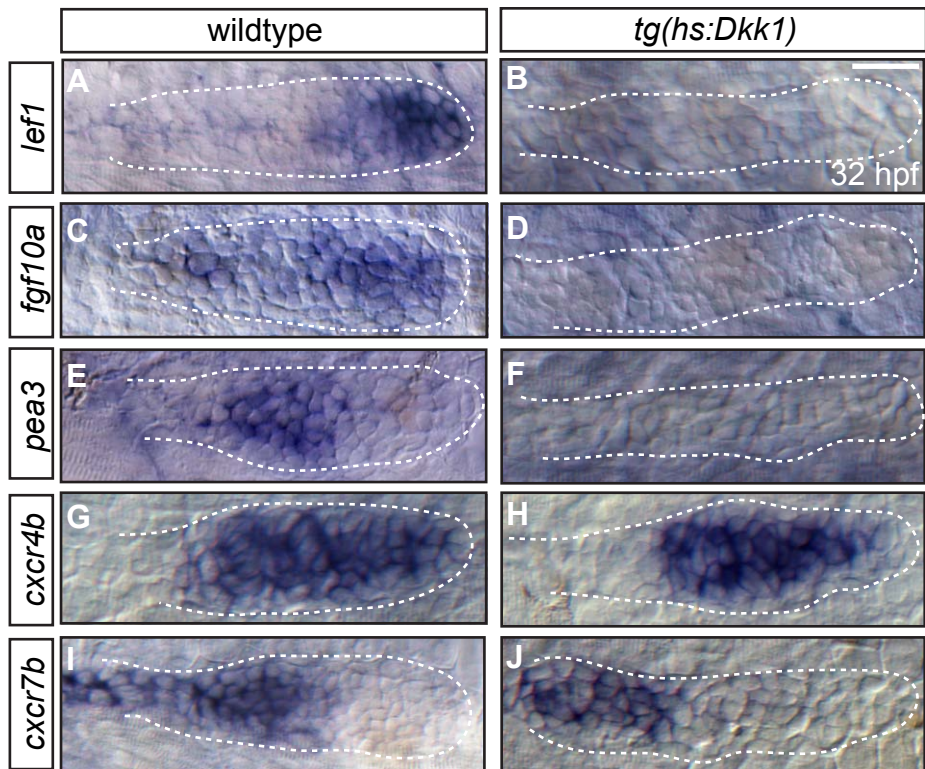

Supplement: supp_138.18.3921_DEV062554FigS4.pdf [file supp_138.18.3921_DEV062554FigS4.pdf]

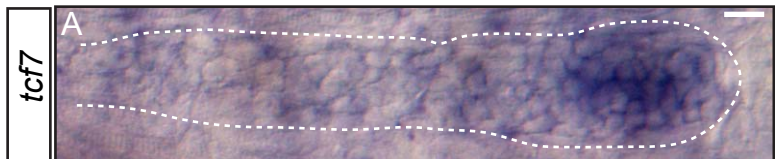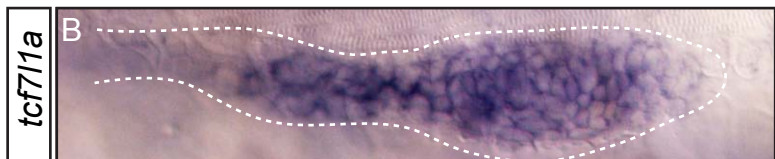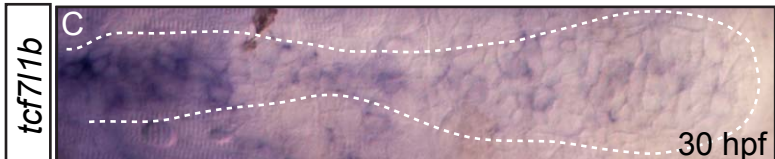

*tcf7*-MO wt sib

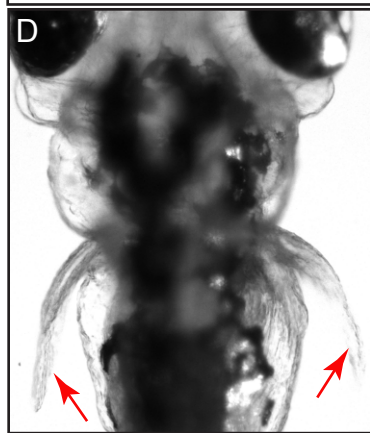

*tcf7*-MO *lef1*<sup>nl2</sup>

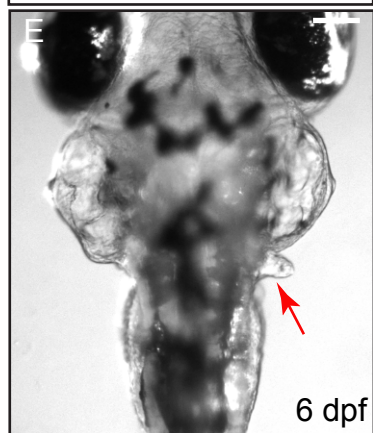

Supplement: supp_138.18.3921_DEV062554FigS5.pdf [file supp_138.18.3921_DEV062554FigS5.pdf]

A

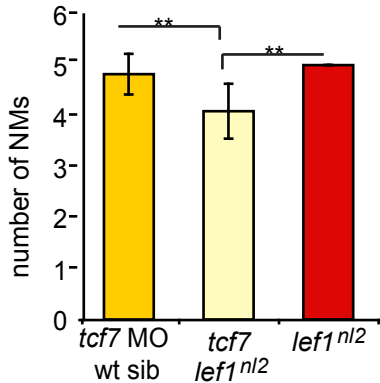

B

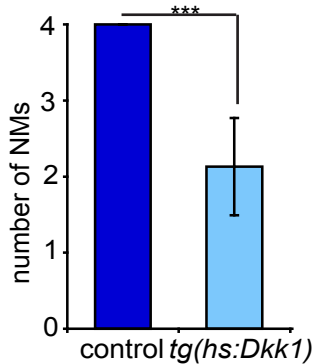

Supplement: supp_138.18.3921_DEV062554FigS6.pdf [file supp_138.18.3921_DEV062554FigS6.pdf]

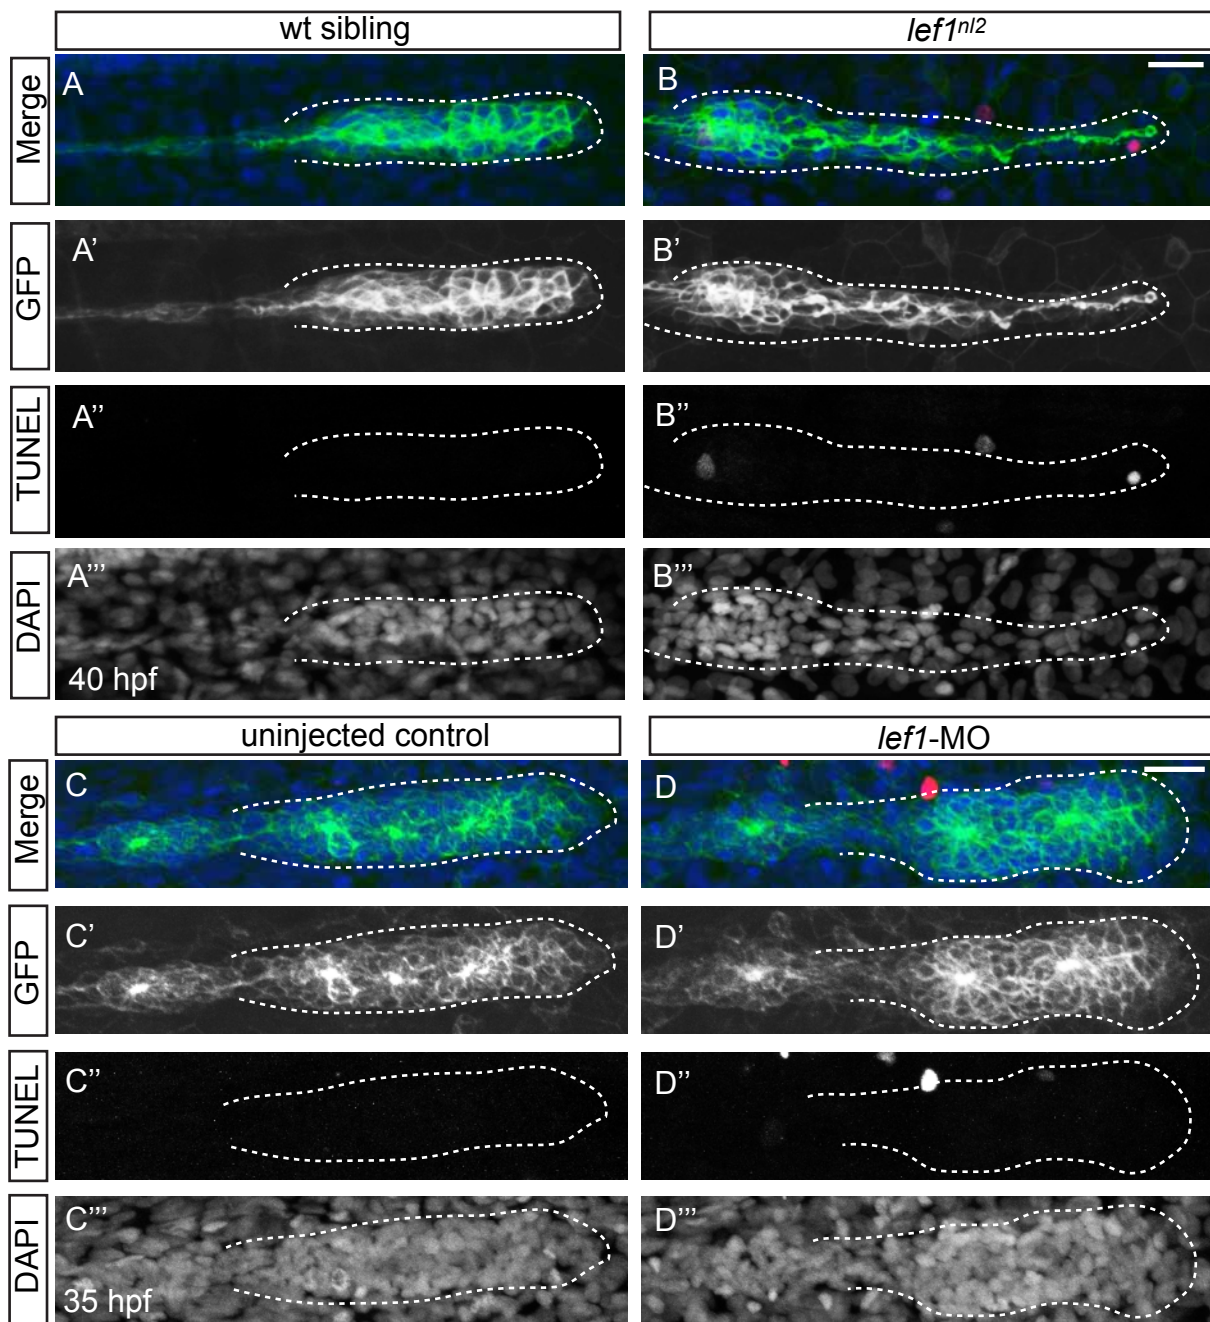

Supplement: supp_138.18.3921_DEV062554FigS7.pdf [file supp_138.18.3921_DEV062554FigS7.pdf]

control

*tg(hs:Dkk1)*

Merge

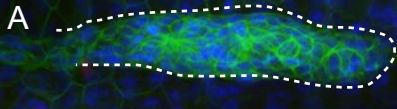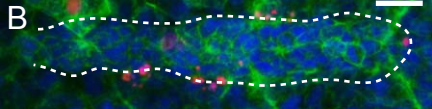

GFP

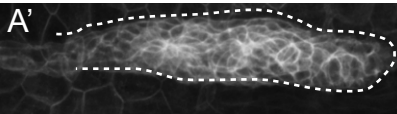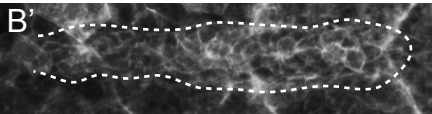

TUNEL

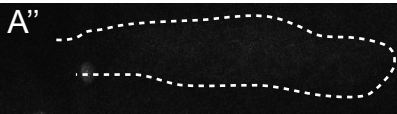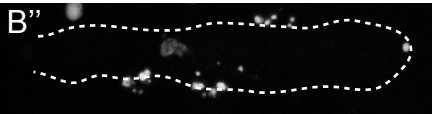

DAPI

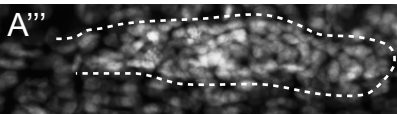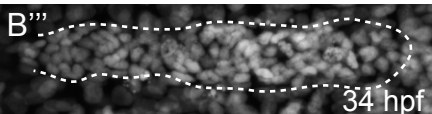

Supplement: supp_138.18.3921_DEV062554FigS8.pdf [file supp_138.18.3921_DEV062554FigS8.pdf]
